# Supplementary material for: Synthesis of mesoporous anatase TiO2 with a combined template method and photocatalysis
Source: Royal Society of Chemistry journal article supplement (doi:10.1039/c0ce00228c), 2010-01-01
Supplement: c0ce00228c.pdf [file c0ce00228c.pdf]

## Synthesis of mesoporous anatase TiO<sub>2</sub> with a combined template method and photocatalysis

Zhigang Xiong, Haiqing Dou, Jiahong Pan, Jizhen Ma, Chen Xu, X. S. Zhao \*

Department of Chemical and Biomolecular Engineering, National University of Singapore, 4 Engineering Drive 4, Singapore 117576. Fax: +65-67791936; Tel: +65-

65164727. E-mail: [chezxs@nus.edu.sg](mailto:chezxs@nus.edu.sg).

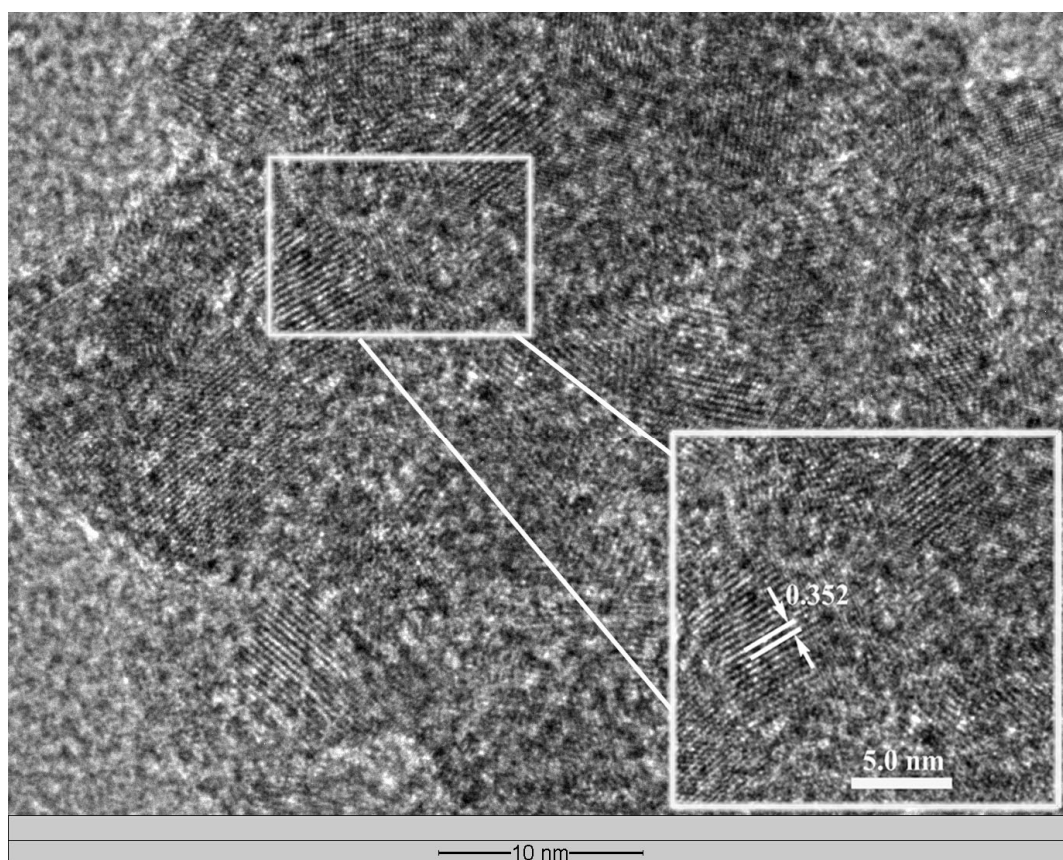

**Figure S1.** HRTEM image of sample TiO<sub>2</sub>(N<sub>2</sub>).

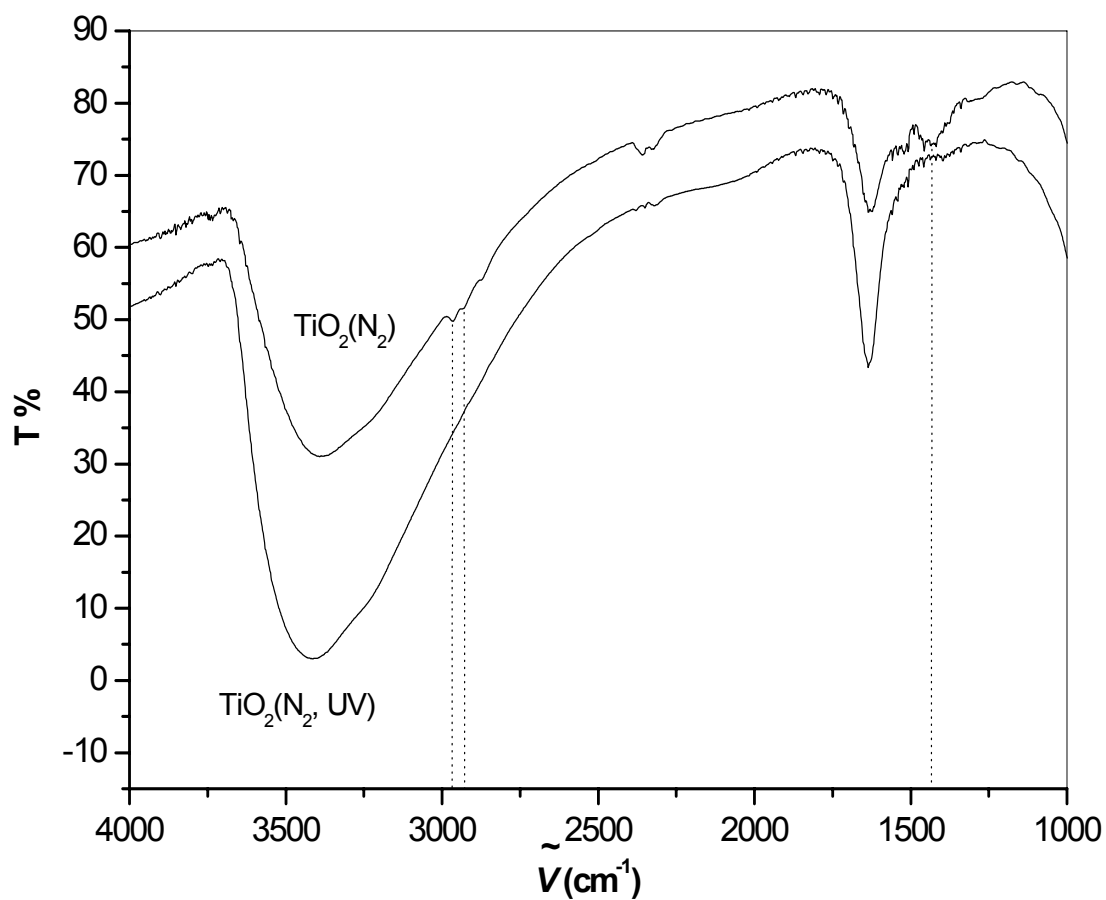

**Figure S2.** FTIR spectra of sample TiO<sub>2</sub>(N<sub>2</sub>) and TiO<sub>2</sub>(N<sub>2</sub>,UV).

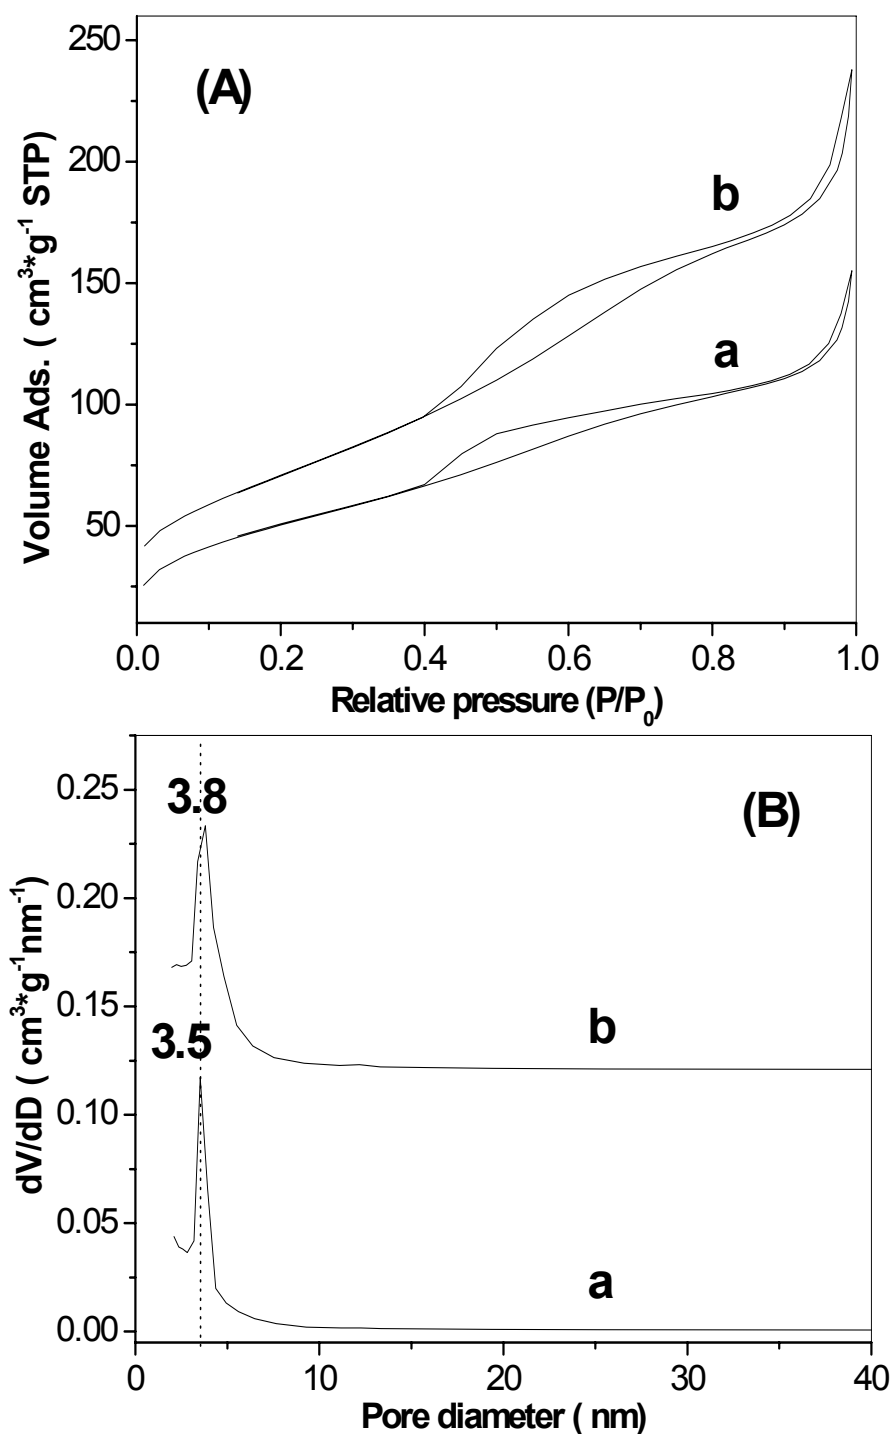

**Figure S3** (A) Nitrogen sorption isotherms and (B) pore size distribution curves of (a) TiO<sub>2</sub>(N<sub>2</sub>) and (b) TiO<sub>2</sub>(N<sub>2</sub>,UV) synthesized using F127 as template.
